# Supplementary material for: Laser ablation of pristine Fe foil for constructing a layer-by-layer SiO2/Fe2O3/Fe integrated anode for high cycling-stability lithium-ion batteries
Source: Royal Society of Chemistry journal article supplement (doi:10.1039/d1cp00153a), 2021-01-01
Supplement: d1cp00153a1.pdf [file d1cp00153a1.pdf]

## SUPPLEMENTARY

### **Laser ablation of pristine Fe foil constructing a layer-by-layer SiO<sub>2</sub>/Fe<sub>2</sub>O<sub>3</sub>/Fe integrated anode for the high cycling-stability lithium-ion batteries**

Zhongyuan Zhang<sup>a,1</sup>, Chen Yang<sup>b,1</sup>, Canfeng Fang<sup>a</sup>, Wenfei Yang<sup>a</sup>, Xue Zhang<sup>a</sup>, Zhiguo Rong<sup>a</sup>,  
Xiyang Li<sup>a</sup>, Feirong Huang<sup>a</sup>, Youngguan Jung<sup>c</sup>, Jing Lu<sup>b</sup>, Xinglong Dong<sup>\*a</sup>

<sup>a</sup>Key Laboratory of Materials Modification by Laser, Ion and Electron Beams (Ministry of Education), School of Materials Science and Engineering, Dalian University of Technology, Dalian, 116024, P.R. China.

<sup>b</sup>State Key Laboratory for Mesoscopic Physics and Department of Physics, Academy for Advanced Interdisciplinary Studies, Peking University, Beijing 100871, P. R. China

<sup>c</sup>Department of Mechanical Engineering, Kumoh National Institute of Technology, Daeharkro 53, Gumi, Gyeong-Buk, 730-701, South Korea

\* Corresponding author.

E-mail: XL Dong, dongxl@dlut.edu.cn. Phone: +86-411-8471630. Fax: +86-411-84706130

<sup>1</sup> The authors contributed equally to this work.

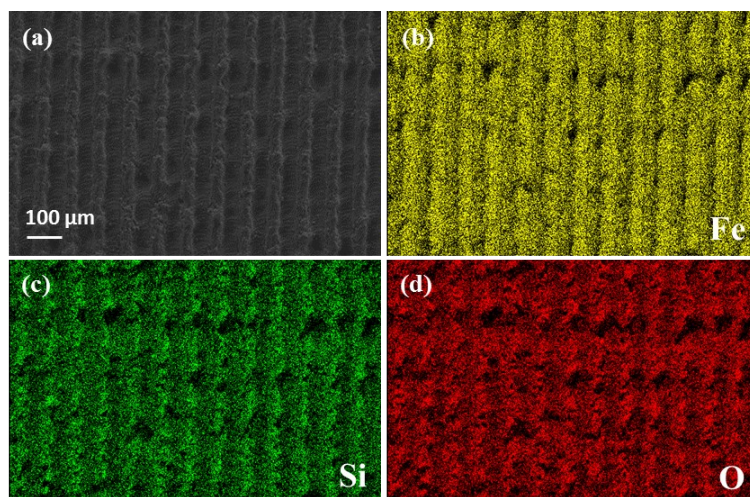

Fig.S1. EDS mapping on Fe (k), Si (l), O (m) elements of the SiO<sub>2</sub>/Fe<sub>2</sub>O<sub>3</sub>/Fe foil.

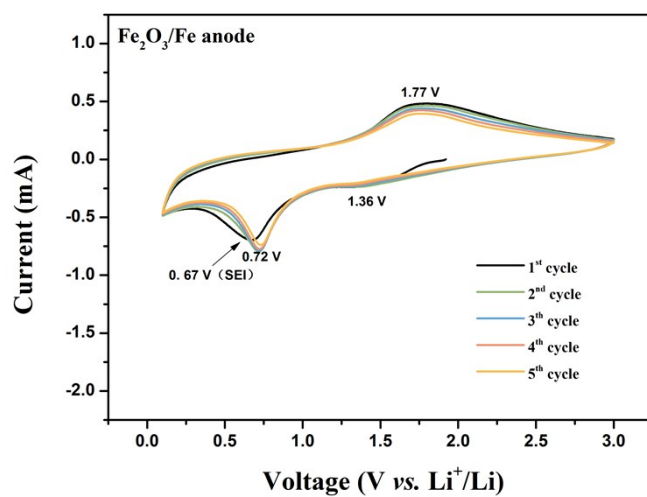

Fig.S2. Cyclic voltammograms of the Fe<sub>2</sub>O<sub>3</sub>/Fe anode over a potential range of 0.01 – 3.00 V (vs. Li<sup>+</sup>/Li) at a scan rate of 0.2 mV·s<sup>-1</sup>

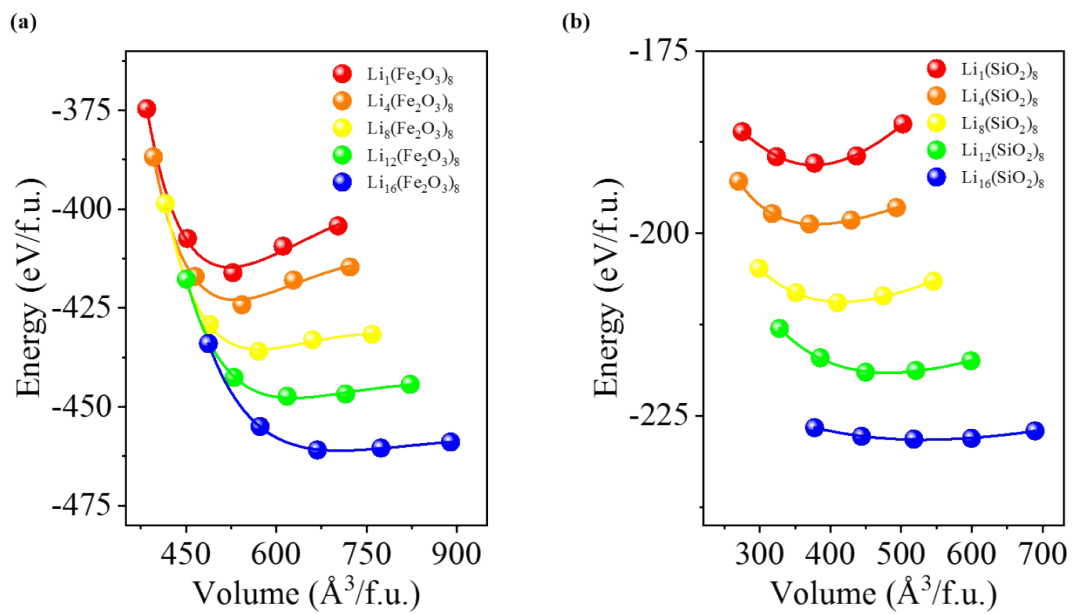

Fig.S3. The fitting B-M plots for  $\text{Li}^+$  adsorbing in amorphous (a) $\text{SiO}_2$  and (b) $\text{Fe}_2\text{O}_3$ .
